# Supplementary material for: Trimerization and Genotype–Phenotype Correlation of COL4A5 Mutants in Alport Syndrome
Source: PubMed Central journal article supplement — Kidney Int Rep. 2020 Jan 30;5(5):718–26. doi: 10.1016/j.ekir.2020.01.008 (PMC7210609; doi:10.1016/j.ekir.2020.01.008), 2020-01-30
Supplement: mmc1.pdf [file mmc1.pdf]

**Supplementary Table 1. Targeted genes included in custom panel of NGS**

---

| Gene              | Gene             | Gene               |
|-------------------|------------------|--------------------|
| 1 <i>ACTN4</i>    | 16 <i>FAT1</i>   | 31 <i>NUP107</i>   |
| 2 <i>ADCK4</i>    | 17 <i>GLEPP1</i> | 32 <i>NUP205</i>   |
| 3 <i>ANLN</i>     | 18 <i>HNF1B</i>  | 33 <i>NUP93</i>    |
| 4 <i>ARHGAP24</i> | 19 <i>INF2</i>   | 34 <i>PAX2</i>     |
| 5 <i>ARHGDI1</i>  | 20 <i>ITGA3</i>  | 35 <i>PDSS2</i>    |
| 6 <i>CD2AP</i>    | 21 <i>ITGB4</i>  | 36 <i>PLCE1</i>    |
| 7 <i>COL4A3</i>   | 22 <i>KANK1</i>  | 37 <i>PTPRO</i>    |
| 8 <i>COL4A4</i>   | 23 <i>KANK2</i>  | 38 <i>SCARB2</i>   |
| 9 <i>COL4A5</i>   | 24 <i>KANK4</i>  | 39 <i>SMARCAL1</i> |
| 10 <i>COQ2</i>    | 25 <i>LAMB2</i>  | 40 <i>TRPC6</i>    |
| 11 <i>COQ6</i>    | 26 <i>LMX1B</i>  | 41 <i>TTC21B</i>   |
| 12 <i>CRB2</i>    | 27 <i>MYH9</i>   | 42 <i>UMOD</i>     |
| 13 <i>CUBN</i>    | 28 <i>MYO1E</i>  | 43 <i>WDR73</i>    |
| 14 <i>DGKE</i>    | 29 <i>NPHS1</i>  | 44 <i>WT1</i>      |
| 15 <i>EMP2</i>    | 30 <i>NPHS2</i>  | 45 <i>XPO5</i>     |

---

**Supplementary Table 2. Primer sequences for mutagenesis of COL4A5**

| Mutation | Sense (5' to 3')                       | Antisense (5' to 3')                  |
|----------|----------------------------------------|---------------------------------------|
| G230C    | gacccaaaggtgaaaaatgtgagcaaggtcttcagggc | gcctgaagaccttgctcacatctttcacctttgggtc |
| G509R    | tectccaggatctctctgtttccctggacagaaa     | ttctgtccagggaacgaagatcctggagga        |
| G805R    | aggtgatgttgacaaatagacaacctggaccaa      | ttggtccaggtgtctatcttggccaacatcacct    |
| G869R    | gtccagggaacctcagacacctgtctctatagg      | cctataggaccaggtgctctggggaacctggac     |
| G953V    | cctccaggccctctgtaccaatggatccaaatc      | gatttggatccattggtacaggaggcctggaagg    |
| G1000V   | gactgagtgacaacctgtattaccaggacca        | tggtctggtataacaggtgtccactcagtc        |
| G1030V   | ggacttaaaggaacctcagtgatattgggtttccaggg | ccctggaaaacctatcactgatggtcctttaagtc   |
| G1140V   | ggtattagtgccctctgtgaaccccgccctteca     | tggaggccgggttcacaggaggccactaatacc     |
| G1143S   | ccctcctgggaacccagccttcaggagaacc        | ggttctcctggaaggctgggttccaggagg        |
| G1149V   | gccttcaggagaacctgtctctgtaggtggtg       | tccaccctacaggaacaggttctcctggaagg      |
